# Supplementary material
Source: PubMed Central journal article supplement (PMC5815895)
Supplement: NIHMS927114-supplement-2.pdf [file NIHMS927114-supplement-2.pdf]

Supplementary Table 1. siRNAs and oligonucleotides used in qPCR experiments.

**A**

| siRNA               | Sequence                |
|---------------------|-------------------------|
| Control (sense)     | AUUGUAUGCGAUCGCAGACdTdT |
| Control (antisense) | GUCUGCGAUCGCAUACAAUdTdT |
| STAT3 (sense)       | GGCUGGACAAUAUCAUUGAdTdT |
| STAT3 (antisense)   | UCAAUGAUAUUGUCCAGCCdTdT |

**B**

| Oligonucleotide                 | Sequence                  |
|---------------------------------|---------------------------|
| <i>CHD5</i> (sense)             | CTACAACGATGCCTCCCAGG      |
| <i>CHD5</i> (antisense)         | ATTGTCGTCGTCCTACTCTGC     |
| <i>CHOP/GADD153</i> (sense)     | TGAAAGCAGGCATCAGACCA      |
| <i>CHOP/GADD153</i> (antisense) | GCAATGACTCAGCTGCCATC      |
| <i>COT</i> (sense)              | GCCGCAGATGCAATCTTCTTAC    |
| <i>COT</i> (antisense)          | TGGCTTTGCAGATACTGCGT      |
| <i>EFNB2</i> (sense)            | GTGCCAGACAAGAGCCATGA      |
| <i>EFNB2</i> (antisense)        | CGTCTGTGCTAGAACCCTGGAT    |
| <i>IGFBP5</i> (sense)           | GGGGTTTGCCTCAACGAAAAG     |
| <i>IGFBP5</i> (antisense)       | TCACGGGAGTCTCTCTCGAT      |
| <i>IGF-2R</i> (sense)           | AGGTGAAGCCCAACGATCAG      |
| <i>IGF-2R</i> (antisense)       | GAGATCGCCGCTCTGAAGGT      |
| <i>MITF</i> (sense)             | ATGGCAAATACGTTGCCTGTC     |
| <i>MITF</i> (antisense)         | GTGAGCTCCCTTTTATGTTGGG    |
| <i>NUAK1/ARK5</i> (sense)       | CAACACAGCCCTCAGATGCT      |
| <i>NUAK1/ARK5</i> (antisense)   | GAGGGCATCACAGTCACACA      |
| <i>PAX6</i> (sense)             | CTTCGCTAATGGGCCAGTGA      |
| <i>PAX6</i> (antisense)         | TCAGATTCTATGCTGATTGGTGA   |
| <i>SLUG</i> (sense)             | GCGTTTTCCAGACCCTGGTT      |
| <i>SLUG</i> (antisense)         | CTTCTCCCCGTGTGAGTTCT      |
| <i>SNAIL</i> (sense)            | CGAGTGTTCTTCTGCGCTA       |
| <i>SNAIL</i> (antisense)        | CTGCTGGAAGGTAAACTCTGGA    |
| <i>SPRED1</i> (sense)           | CAGATCGGATCACGGTGAGG      |
| <i>SPRED1</i> (antisense)       | GTGCATAACTATTATCGTTGTCAGA |
| <i>STAT3</i> (sense)            | GAAACAGTTGGGACCCCTGA      |
| <i>STAT3</i> (antisense)        | AGGTACCGTGTGCAAGCTG       |
| <i>TBP</i> (sense)              | CGGCTGTTAACTTCGCTTC       |
| <i>TBP</i> (antisense)          | CACACGCCAAGAAACAGTGA      |
| <i>TGF-βRII</i> (sense)         | GTCTATGACGAGCAGCGGG       |
| <i>TGF-βRII</i> (antisense)     | CGTTATTAACCGACTTCTGAACGTG |
| <i>TRPM1</i> (sense)            | CAGTGCTGGACTGAGGCTATT     |
| <i>TRPM1</i> (antisense)        | ACAGCAACACCTGTTAGAGTCTT   |
| <i>TRPM3</i> (sense)            | CAGAATCAGTGCTCAGGCTCA     |
| <i>TRPM3</i> (antisense)        | GAAGCACGGAGATACTGGGG      |
| <i>TYR</i> (sense)              | AGATTCAGACCCAGACTCTTTTCA  |
| <i>TYR</i> (antisense)          | GACACAGCAAGCTCACAAAGC     |
