# Supplementary material
Source: PubMed Central journal article supplement (PMC5815895)
Supplement: NIHMS927114-supplement-3.pdf [file NIHMS927114-supplement-3.pdf]

**Supplementary Table 2. List of miRNAs showing highest differential expression between A375-VR and parental A375 cells**

| <b>miRNA</b>          | <b>Log<sub>2</sub> FC</b> | <b><i>p</i>-value</b> | <b>Adjusted <i>p</i>-value</b> |
|-----------------------|---------------------------|-----------------------|--------------------------------|
| <b>hsa-miR-204-5p</b> | 0,94                      | 5,07E-149             | 5,53E-145                      |
| <b>hsa-miR-211-5p</b> | 6,32                      | 3,07E-09              | 2,91E-06                       |
| <b>hsa-miR-4454</b>   | -3,50                     | 3,43E-08              | 2,88E-05                       |
| <b>hsa-miR-509-3p</b> | 1,28                      | 3,68E-07              | 2,87E-04                       |
| <b>hsa-miR-210-3p</b> | -0,92                     | 5,42E-06              | 3,29E-03                       |
| <b>hsa-miR-504-5p</b> | 1,25                      | 2,60E-05              | 1,39E-02                       |
| <b>hsa-miR-140-3p</b> | -1,05                     | 6,01E-05              | 2,92E-02                       |
