# Supplementary material
Source: PubMed Central journal article supplement (PMC5815895)

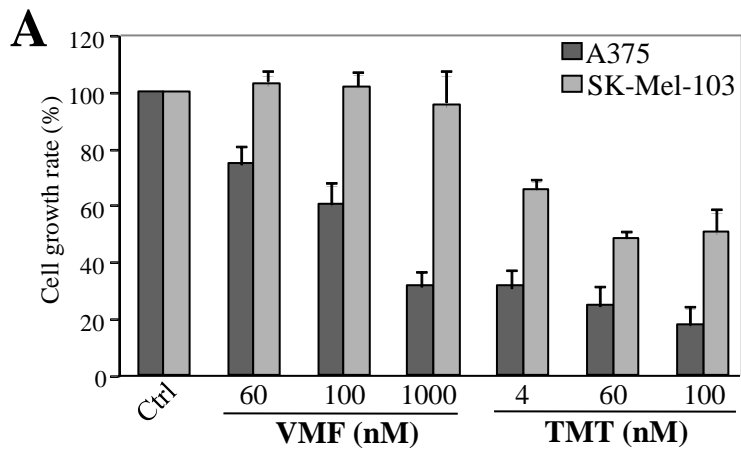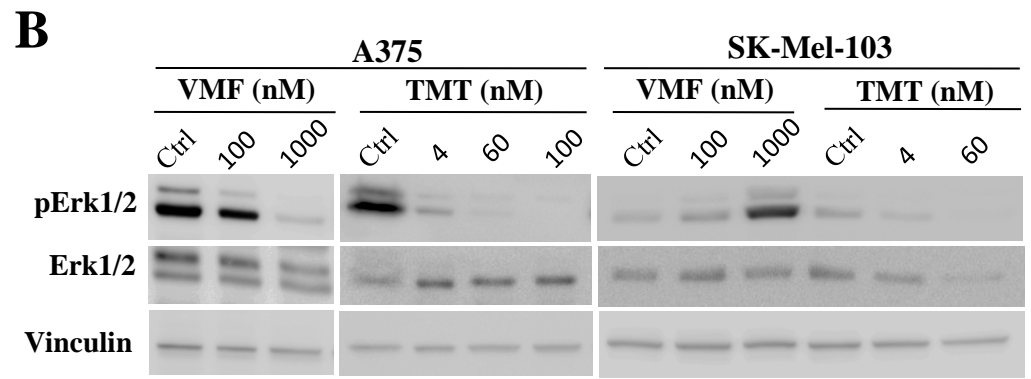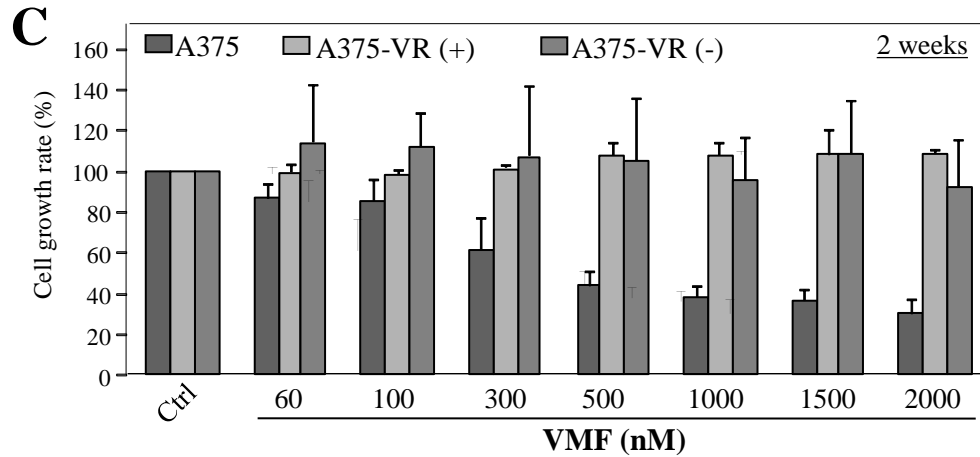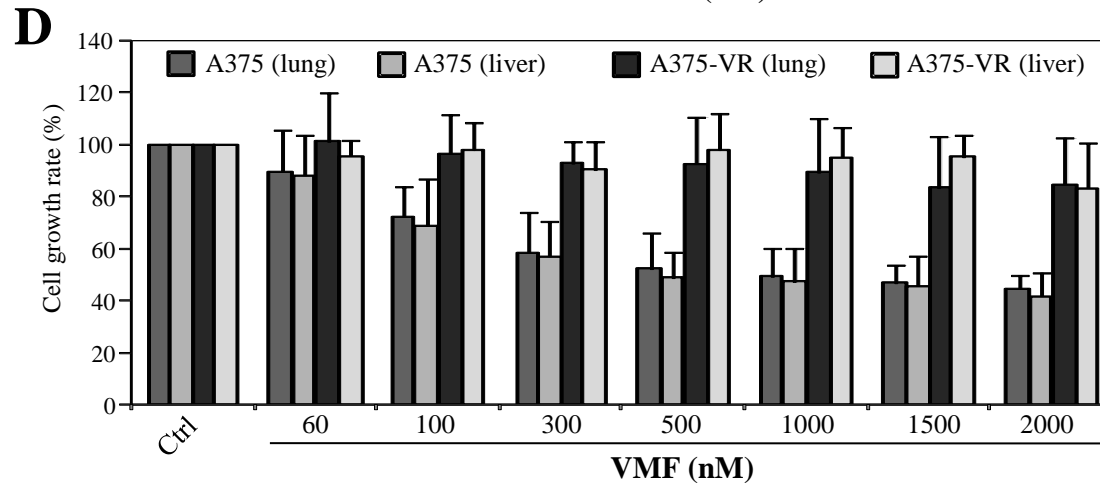

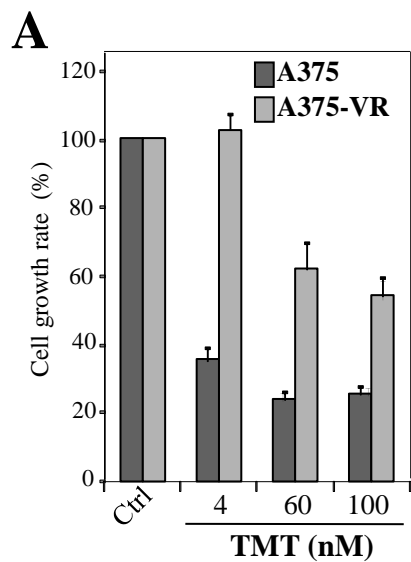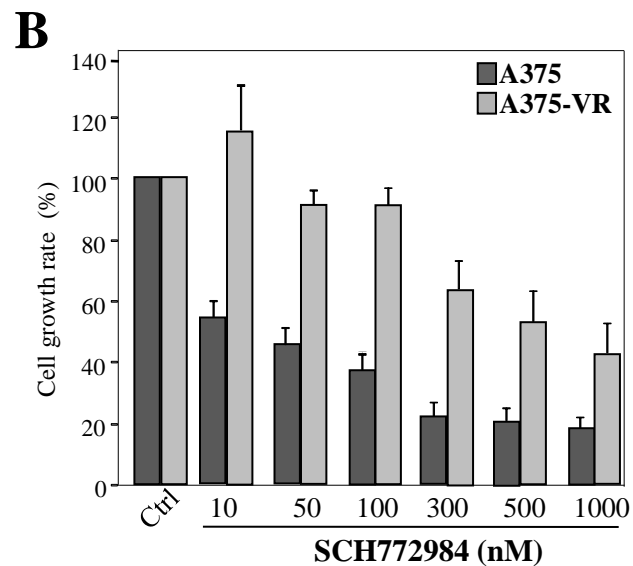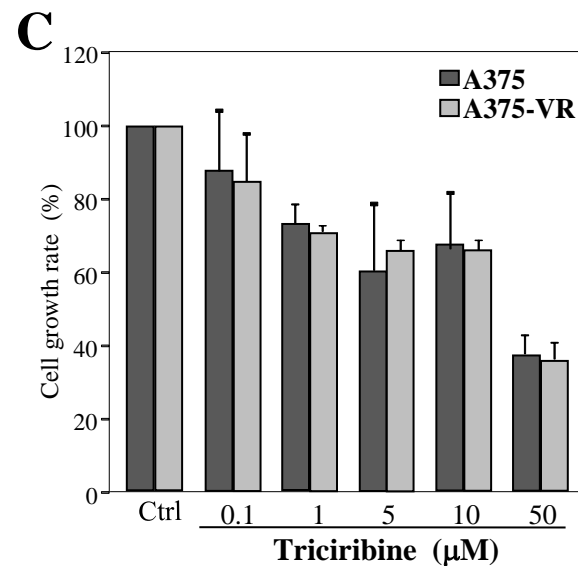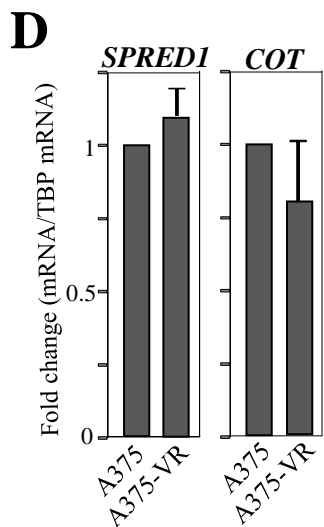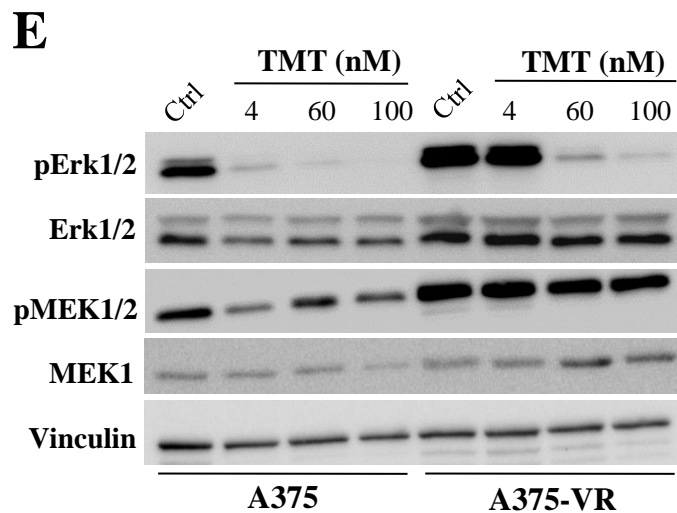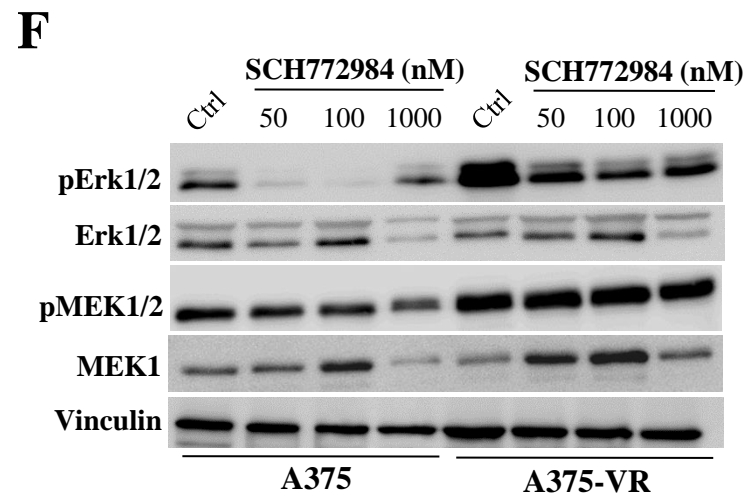

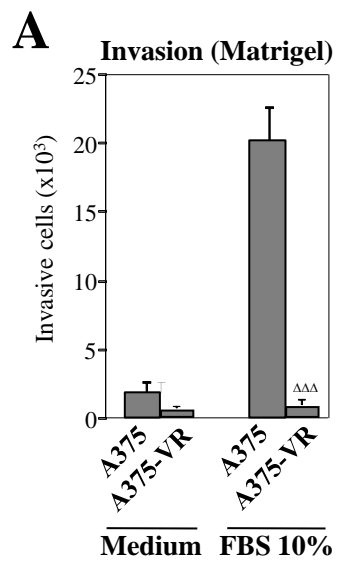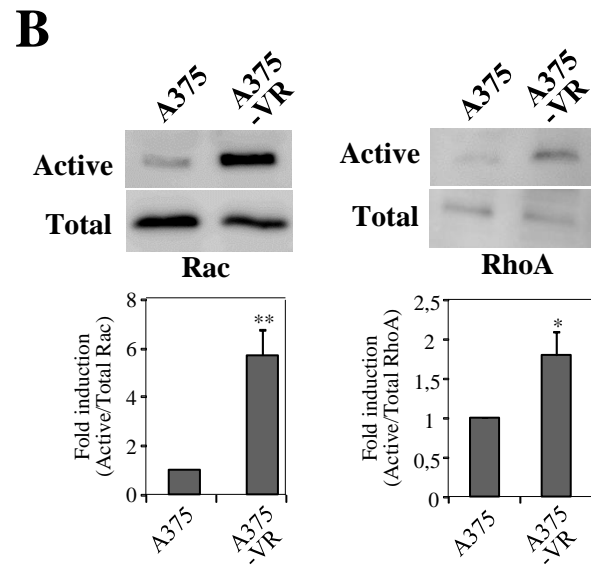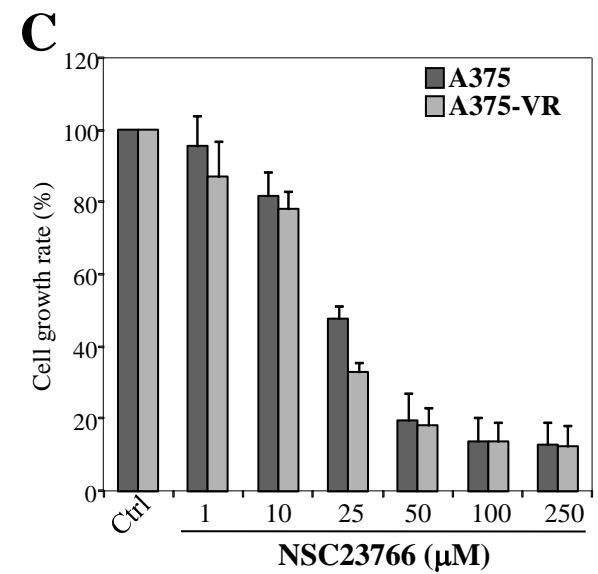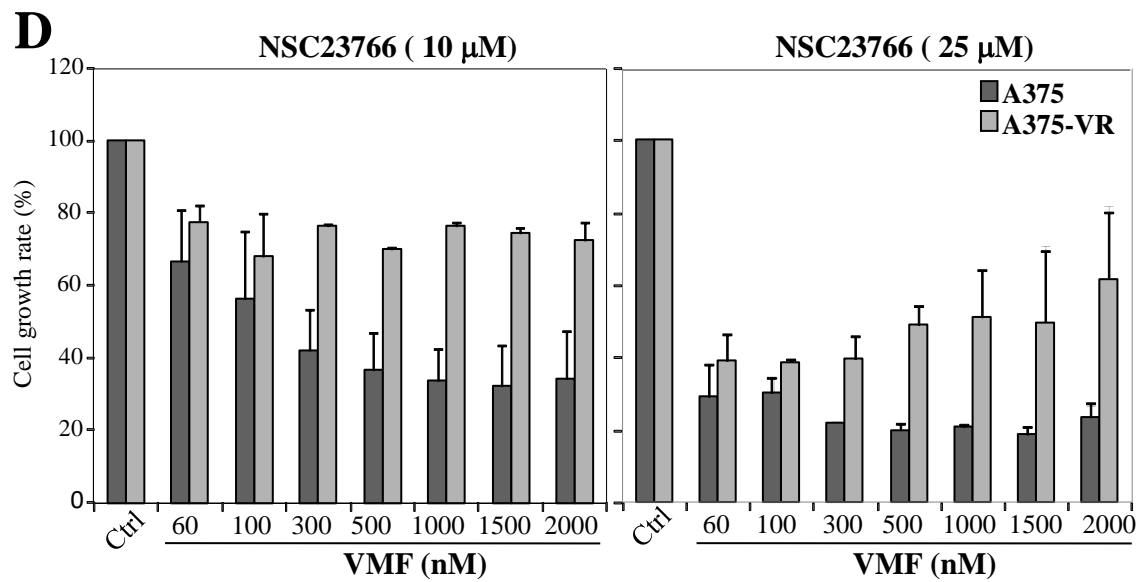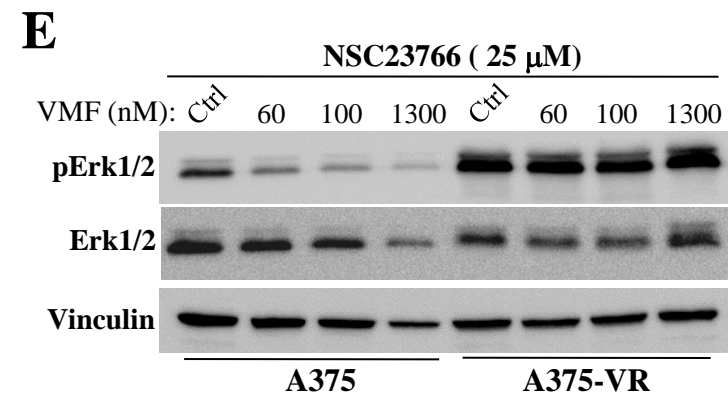

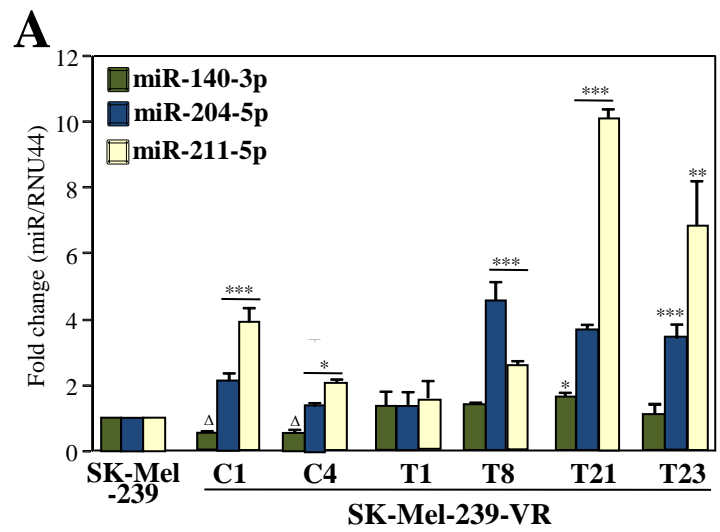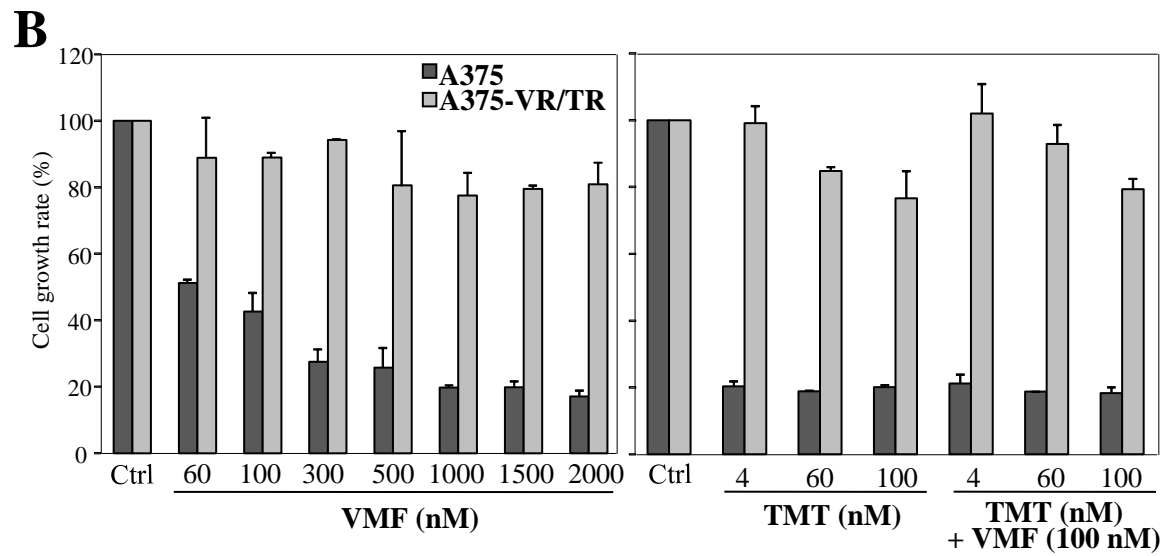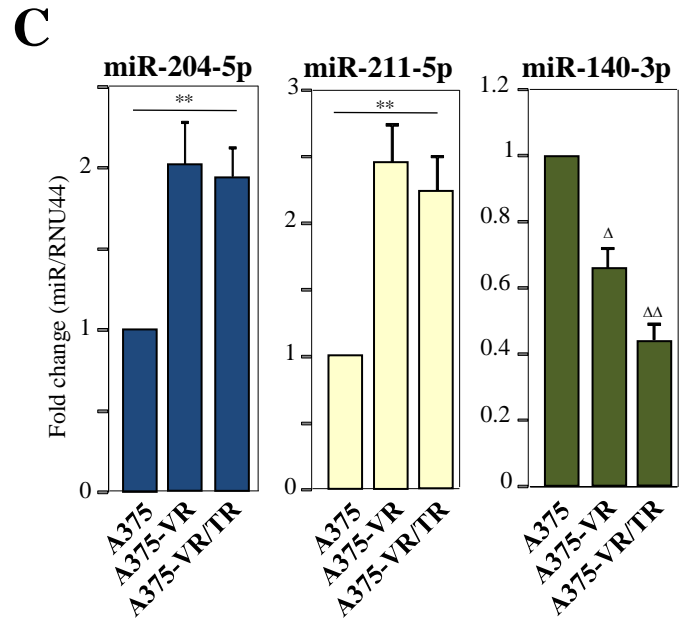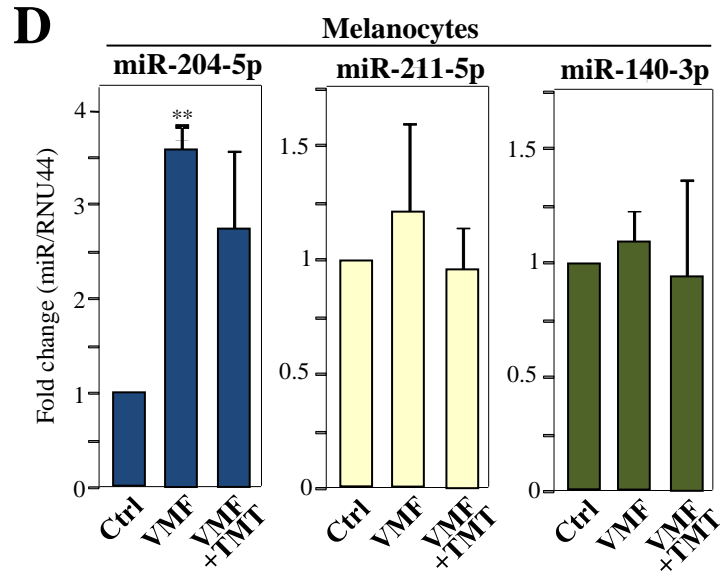

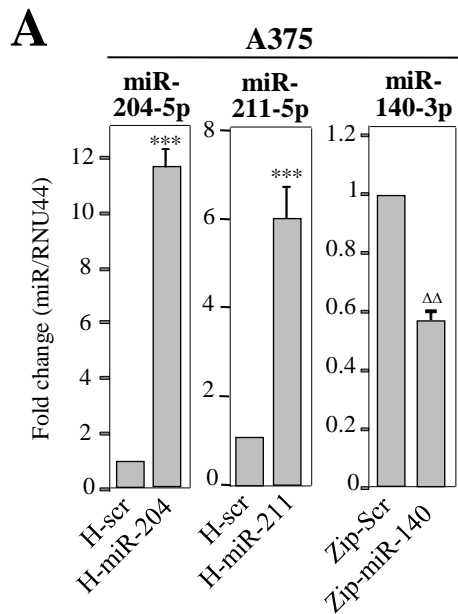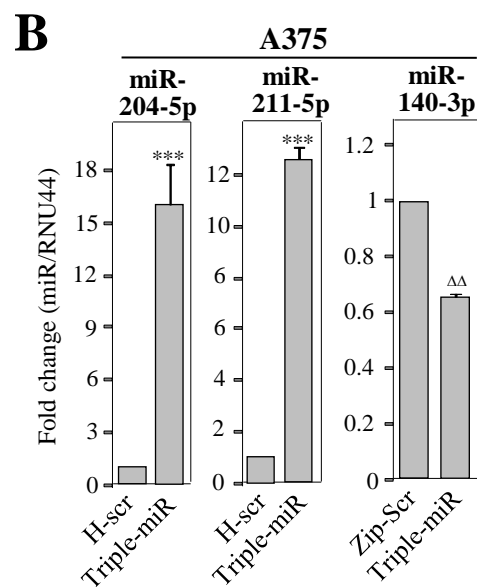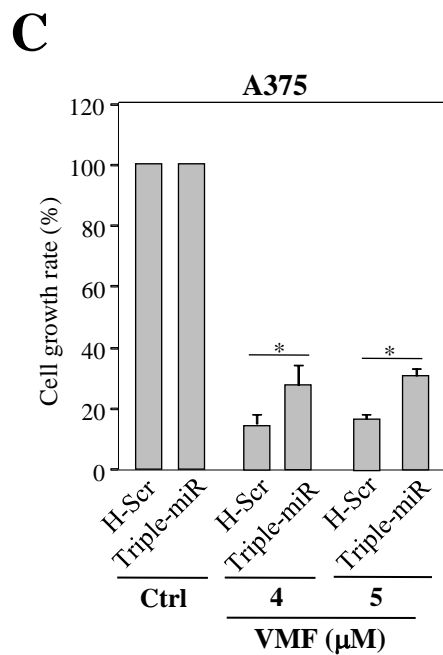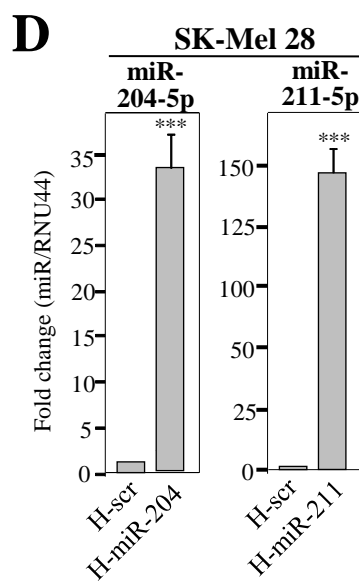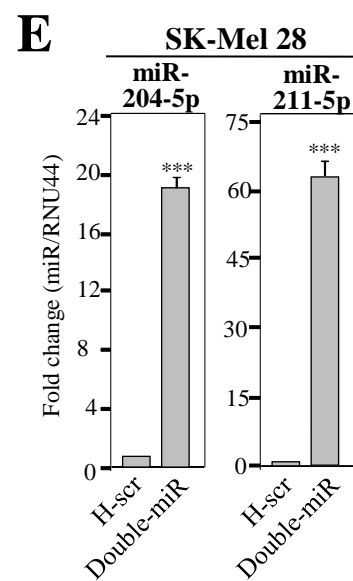

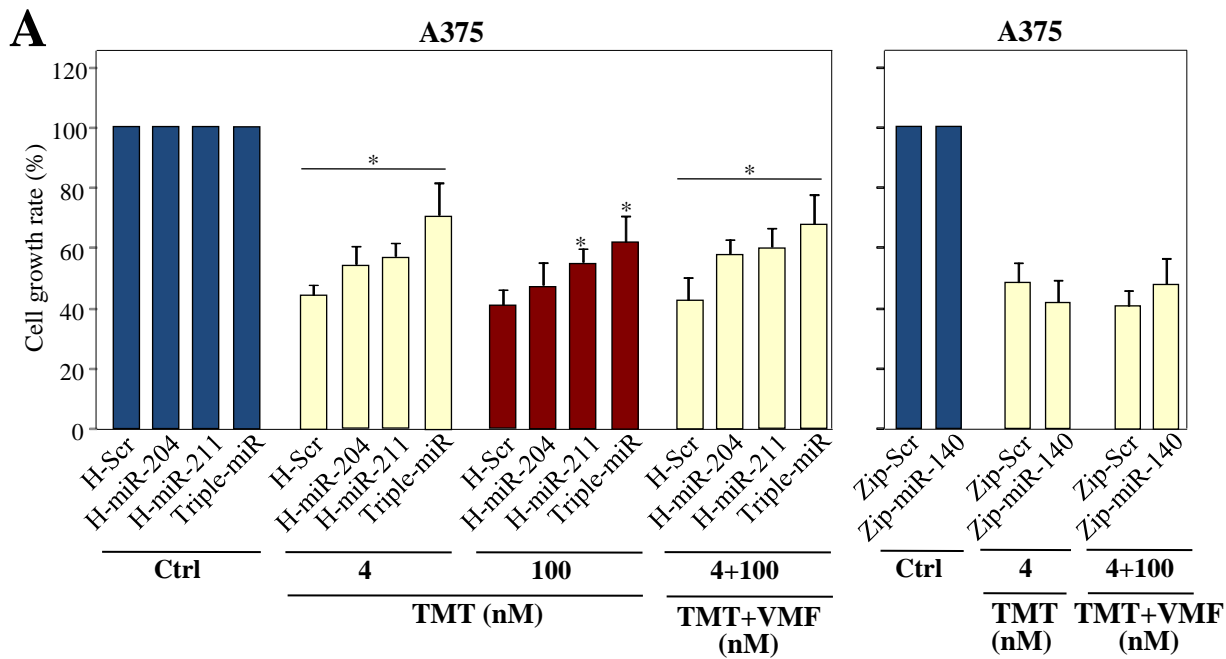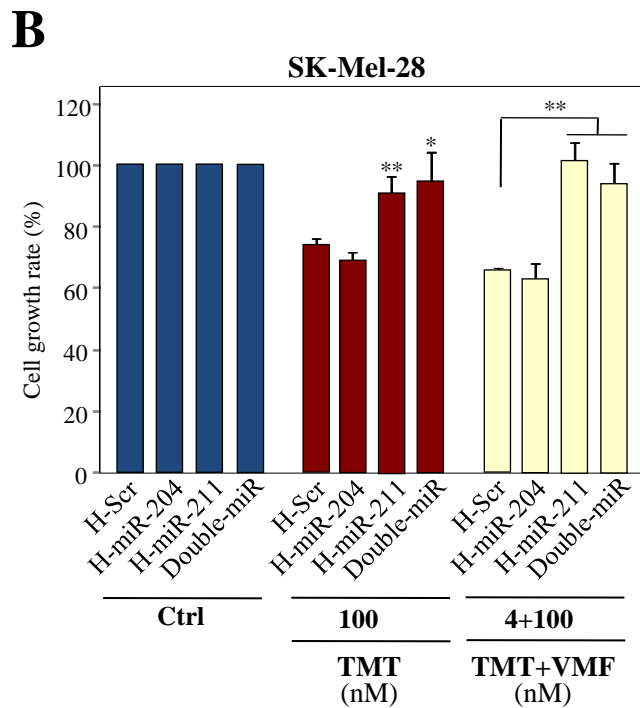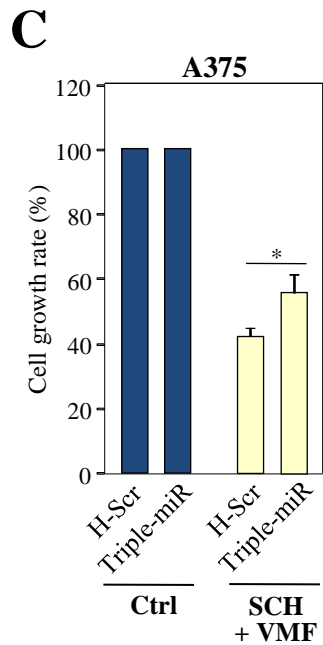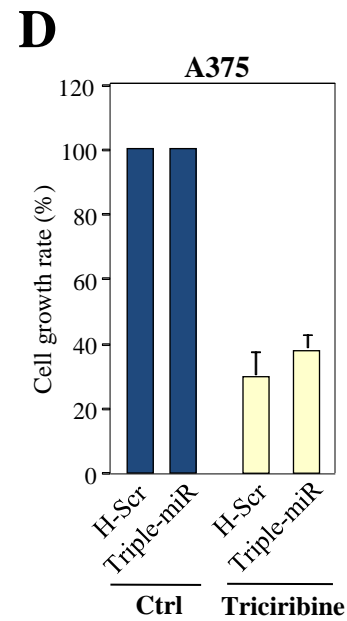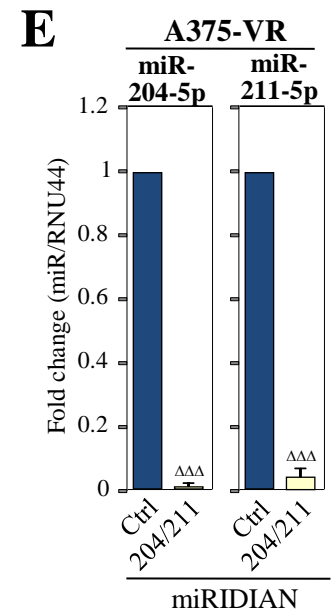

**A**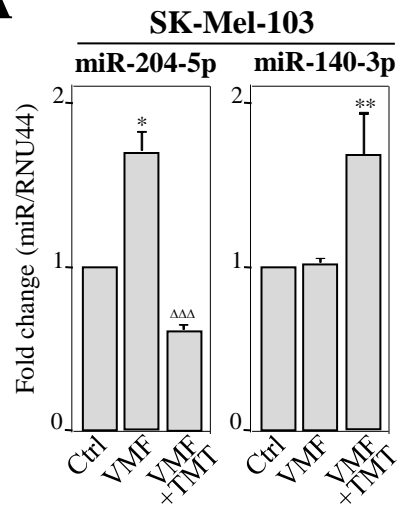**B**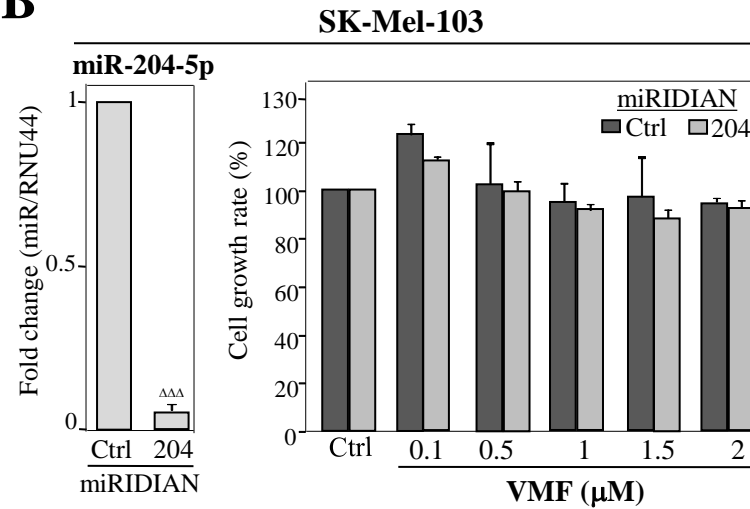

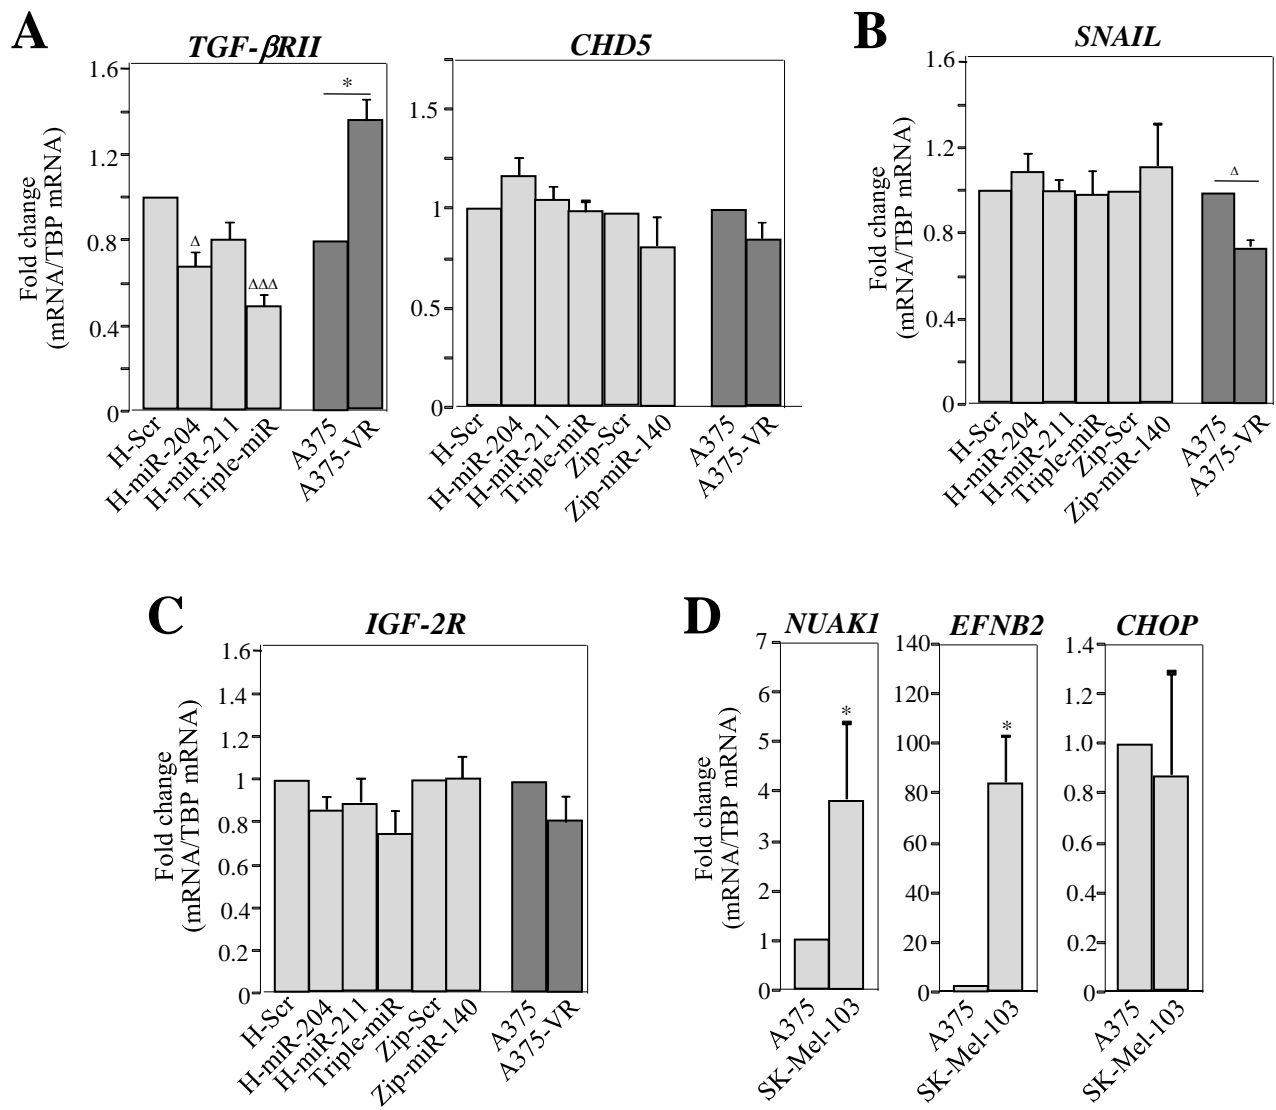

Supplement: NIHMS927114-supplement-1.pdf [file NIHMS927114-supplement-1.pdf]
